# Supplementary material for: An Integrated Approach to the Taxonomic Identification of Prehistoric Shell Ornaments
Source: PubMed Central journal article supplement (PMC4061022; doi:10.1371/journal.pone.0099839), 2014-06-17
Supplement: pone.0099839.s002.pdf [file pone.0099839.s002.pdf]

## SI-2 Amino acid analysis

**Table S-1: Normalised amino acid compositions for the Great Cornard beads.**

| <b>Bead ID</b> | <b>Asx</b>  | <b>Glx</b>  | <b>Ser</b> | <b>Gly</b>  | <b>Ala</b>  | <b>Val</b>  |
|----------------|-------------|-------------|------------|-------------|-------------|-------------|
| 4283           | 42.57 ±0.02 | 9.32 ±0.38  | 6.2 ±0.08  | 12.94 ±0.65 | 19.26 ±0.55 | 9.72 ±0.42  |
| 4283           | 43.61 ±0.14 | 9.84 ±0.06  | 5.72 ±0.13 | 12.76 ±0.3  | 18.55 ±0.0  | 9.52 ±0.24  |
| 3852           | 44.47 ±0.11 | 9.65 ±0.04  | 5.87 ±0.02 | 12.08 ±0.45 | 18.16 ±0.08 | 9.75 ±0.33  |
| 4162           | 39.32 ±0.58 | 8.97 ±0.02  | 6.4 ± 0.2  | 13.75 ±0.68 | 20.51 ±0.08 | 11.04 ±0.24 |
| 3688           | 40.23 ±0.31 | 10.55 ±0.18 | 6.45 ±0.27 | 16.56 ±0.13 | 17.17 ±0.67 | 9.04 ±0.21  |
| 3884           | 39.38 ±0.46 | 11.2 ± 0.08 | 6.26 ±0.07 | 16.05 ±0.68 | 18.15 ±0.13 | 8.96 ±0.06  |
| 3870           | 17.67 ±0.1  | 16.68 ±0.24 | 8.38 ±0.57 | 32.96 ±1.3  | 17.78 ±0.51 | 6.68 ±0.09  |

The total hydrolysable amino acid (THAA) normalised concentrations are reported as the mean and standard deviation of the two analytical replicates obtained for each sample. Two sub-samples were analysed from bead 4283.
